# Supplementary material
Source: Research Square preprint supplement (doi:10.21203/rs.3.rs-9179233/v1)
Supplement: Supplementary file 1 [file ada9cdba4dc7886c477e8e66.pdf]

1 **Supplementary Figures**

2 **The DoGA Consortium Atlas of Canine Enhancers and Promoters Across Tissues**  
3 **and Development**

4 Isil Takan<sup>1</sup>, Matthias Hortenhuber<sup>1</sup>, Noora Salokorpi<sup>2,3</sup>, Rijja Bokhari<sup>1</sup>, Cesar Araujo<sup>2,3,4</sup>, Rasha  
5 Aljelaify<sup>1,6</sup>, Ileana Quintero<sup>2,3,4</sup>, Sini Ezer<sup>4,5</sup>, Faezeh Mottaghitalab<sup>1</sup>, Amitha Raman<sup>1,6</sup>, Fiona  
6 Ross<sup>1,6</sup>, DoGA Consortium, Tarja Jokinen<sup>9</sup>, Pernilla Syrja<sup>7</sup>, Danika Bannasch<sup>9</sup>, Antti Iivanainen<sup>2</sup>,  
7 Marjo K Hytonen<sup>2,3,4</sup>, Juha Kere<sup>1,4,5\*</sup>, Hannes Lohi<sup>2,3,4\*</sup>, Carsten O. Daub<sup>1,6\*</sup>

8 1) Department of Medicine, Huddinge, Karolinska Institutet, Huddinge, Sweden

9 2) Department of Veterinary Biosciences, University of Helsinki, 00014 Helsinki, Finland.

10 3) Department of Medical and Clinical Genetics, University of Helsinki, 00014 Helsinki, Finland.

11 4) Folkhälsan Research Center, 00290 Helsinki, Finland.

12 5) Stem Cells and Metabolism Research Program, University of Helsinki, Helsinki, Finland.

13 6) Science for Life Laboratory, Karolinska Institutet, Stockholm, Sweden.

14 7) Department of Veterinary Pathology, Faculty of Veterinary Medicine, University of Helsinki,  
15 Helsinki, Finland.

16 8) Department of Equine and Small Animal Medicine, University of Helsinki, Helsinki, Finland.

17 9) Department of Population Health and Reproduction, School of Veterinary Medicine, University  
18 of California Davis, US.

19

\*co-corresponding authors

20

21

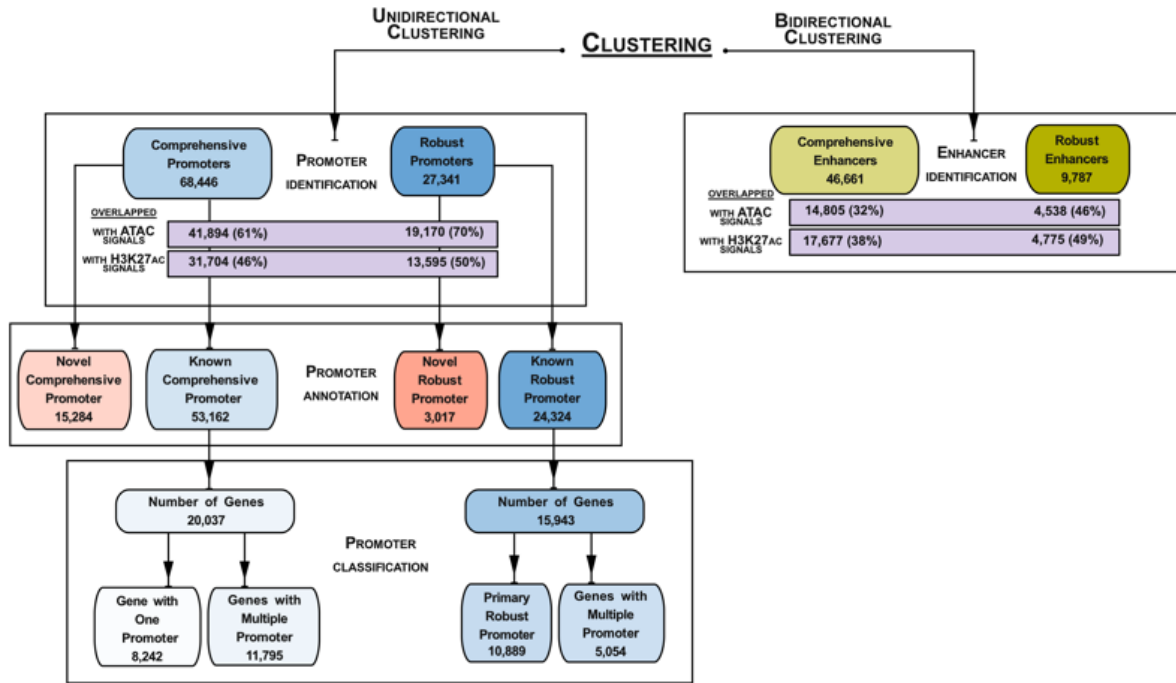

22 Figure S1: The number of regulatory elements (promoters and enhancers).  
 23 The 'promoter identification' box shows the number of promoters identified with external  
 24 validation. We established comprehensive and robust collections of promoter elements based on  
 25 expression level, the number of samples exhibiting that level, and the width of the element.  
 26 The number of elements overlapped with ATAC signal and H3K27ac signals was displayed.  
 27 Percentages represent the total number of epigenetic signals relative to the overlapped signal for  
 28 each marker. The 'promoter annotation' box shows the number of annotated and novel to CanFam4  
 29 for both sets. The 'promoter classification' box shows the promoter-gene relations. We classified  
 30 promoters as genes with one promoter and genes with multiple promoters. The 'enhancer  
 31 identification' box shows the number of enhancers identified with external validation.

32  
33  
34  
35  
36  
37  
38  
39  
40  
41  
42  
43  
44

|    |                                 |                  |               |        |                        |                  |                 |             |            |                  |
|----|---------------------------------|------------------|---------------|--------|------------------------|------------------|-----------------|-------------|------------|------------------|
| 45 | Colon                           |                  |               |        | 1                      | 1                |                 | 1           |            |                  |
| 46 | Liver                           |                  |               |        |                        | 1                |                 | 1           | 1          |                  |
| 47 | Pancreas                        | 1                |               |        | 1                      |                  |                 | 1           |            |                  |
| 48 | Stomach                         | 1                |               |        |                        | 1                |                 |             | 1          |                  |
| 49 | Embryo                          |                  |               |        |                        |                  | 6               |             |            |                  |
| 50 | Artery, Vena Cava               | 1                |               |        |                        | 1                |                 | 1           |            |                  |
| 51 | Cardiac Muscle Tissue           |                  |               |        |                        | 1                |                 | 1           | 1          |                  |
| 52 | Heart (Endocardium, Valve)      |                  | 1             | 1      |                        | 1                |                 |             |            |                  |
| 53 | Caudate Nucleus, amygdala       |                  |               |        |                        |                  |                 |             | 1          |                  |
| 54 | Cerebellum (Hemisphere, Vermis) |                  |               |        | 1                      |                  |                 | 1           | 1          |                  |
| 55 | Cerebral Cortex                 |                  |               |        | 1                      |                  |                 | 2           |            |                  |
| 56 | Corpus Callosum                 | 1                |               |        |                        | 1                |                 | 1           |            |                  |
| 57 | Diencephalon, LGN               | 1                |               |        | 1                      |                  |                 | 1           |            |                  |
| 58 | Hippocampal Formation           |                  |               |        |                        | 1                |                 | 2           |            |                  |
| 59 | Neurohypophysis                 |                  |               |        |                        | 1                |                 | 1           | 1          |                  |
| 60 | Olfactory Bulb                  | 1                |               |        | 1                      |                  |                 |             | 1          |                  |
| 61 | Piriform Lobe                   |                  |               |        | 1                      |                  |                 | 1           | 2          |                  |
| 62 | Spinal Cord                     | 1                |               |        |                        | 1                |                 |             | 1          |                  |
| 63 | Spinal Ganglion                 | 1                |               |        | 1                      |                  |                 | 1           |            |                  |
| 64 | Brainstem                       | 1                |               |        |                        |                  |                 | 1           | 1          |                  |
| 65 | Adenohypophysis                 |                  |               |        |                        | 1                |                 | 1           | 1          |                  |
| 66 | Adrenal Gland                   |                  |               |        | 1                      |                  |                 | 1           | 1          |                  |
| 67 | Parathyroid Gland               |                  | 1             |        |                        | 1                |                 |             |            |                  |
| 68 | Thyroid Gland                   | 1                |               |        |                        | 1                |                 | 1           | 1          |                  |
| 69 | Retina, Optic II Nerve          |                  |               |        |                        | 1                |                 | 1           | 1          |                  |
| 70 | Bone Marrow                     |                  |               |        | 1                      |                  |                 | 1           | 1          |                  |
| 71 | Spleen                          |                  |               |        | 1                      | 1                |                 | 1           |            |                  |
| 72 | Skin                            |                  |               |        |                        | 2                |                 | 4           |            |                  |
| 73 | Skeletal Muscle                 |                  |               |        |                        |                  |                 | 2           | 1          |                  |
| 74 | Olfactory System                |                  |               |        |                        |                  |                 | 1           |            |                  |
| 75 | Ovary                           | 1                |               |        |                        | 1                |                 |             | 1          |                  |
| 76 | Prostate Gland                  |                  | 1             |        |                        |                  |                 | 2           |            |                  |
| 77 | Testis                          |                  | 1             |        |                        |                  |                 | 2           |            |                  |
| 78 | Uterus                          |                  |               | 1      |                        | 1                |                 |             | 1          |                  |
| 79 | Lung                            |                  |               |        |                        | 1                |                 | 1           | 1          |                  |
| 80 | Trachea, Bronchus               |                  | 1             |        | 1                      |                  |                 | 1           |            |                  |
| 81 | Kidney                          |                  | 1             |        |                        | 1                |                 |             | 1          |                  |
| 82 |                                 | Alaskan Malamute | Border Collie | Collie | East-European Shepherd | Finnish Lapphund | German Pinscher | Mixed Breed | Rottweiler | Swedish Elkhound |

86 Figure S2: Sample collection with details.

87 CAGE tissues and pools, are listed alphabetically. Each column represents a different breed. Each  
88 tissue row indicates the number of breeds present in that tissue.

# TES 5

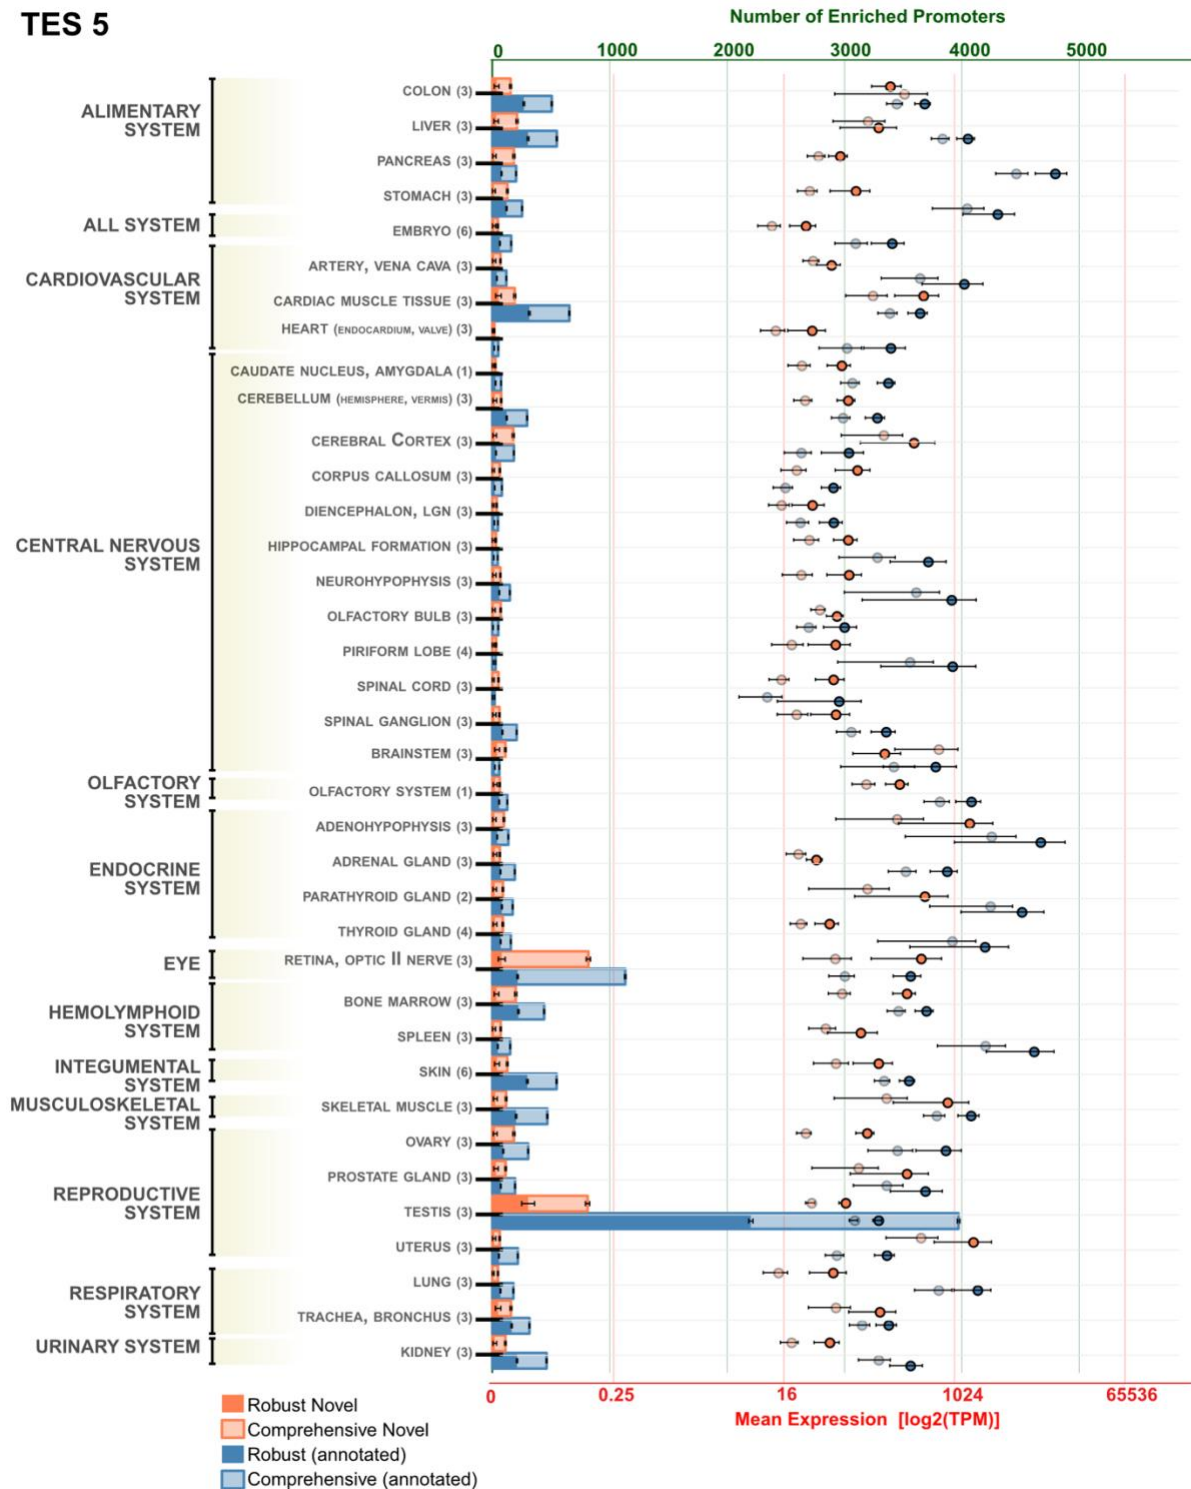

89

90 Figure S3: Tissue Enrichment Score 5 - Promoter.

91 The figure shows promoters with a tissue enrichment score of five for each tissue. The y-axis  
 92 shows CAGE tissue pools and the related organ systems, listed alphabetically. The top x-axis  
 93 indicates the number of promoters enriched in each tissue, while the bottom x-axis shows the mean  
 94 expression (log<sub>2</sub> TPM) of elements enriched in those tissues.

# TES 10

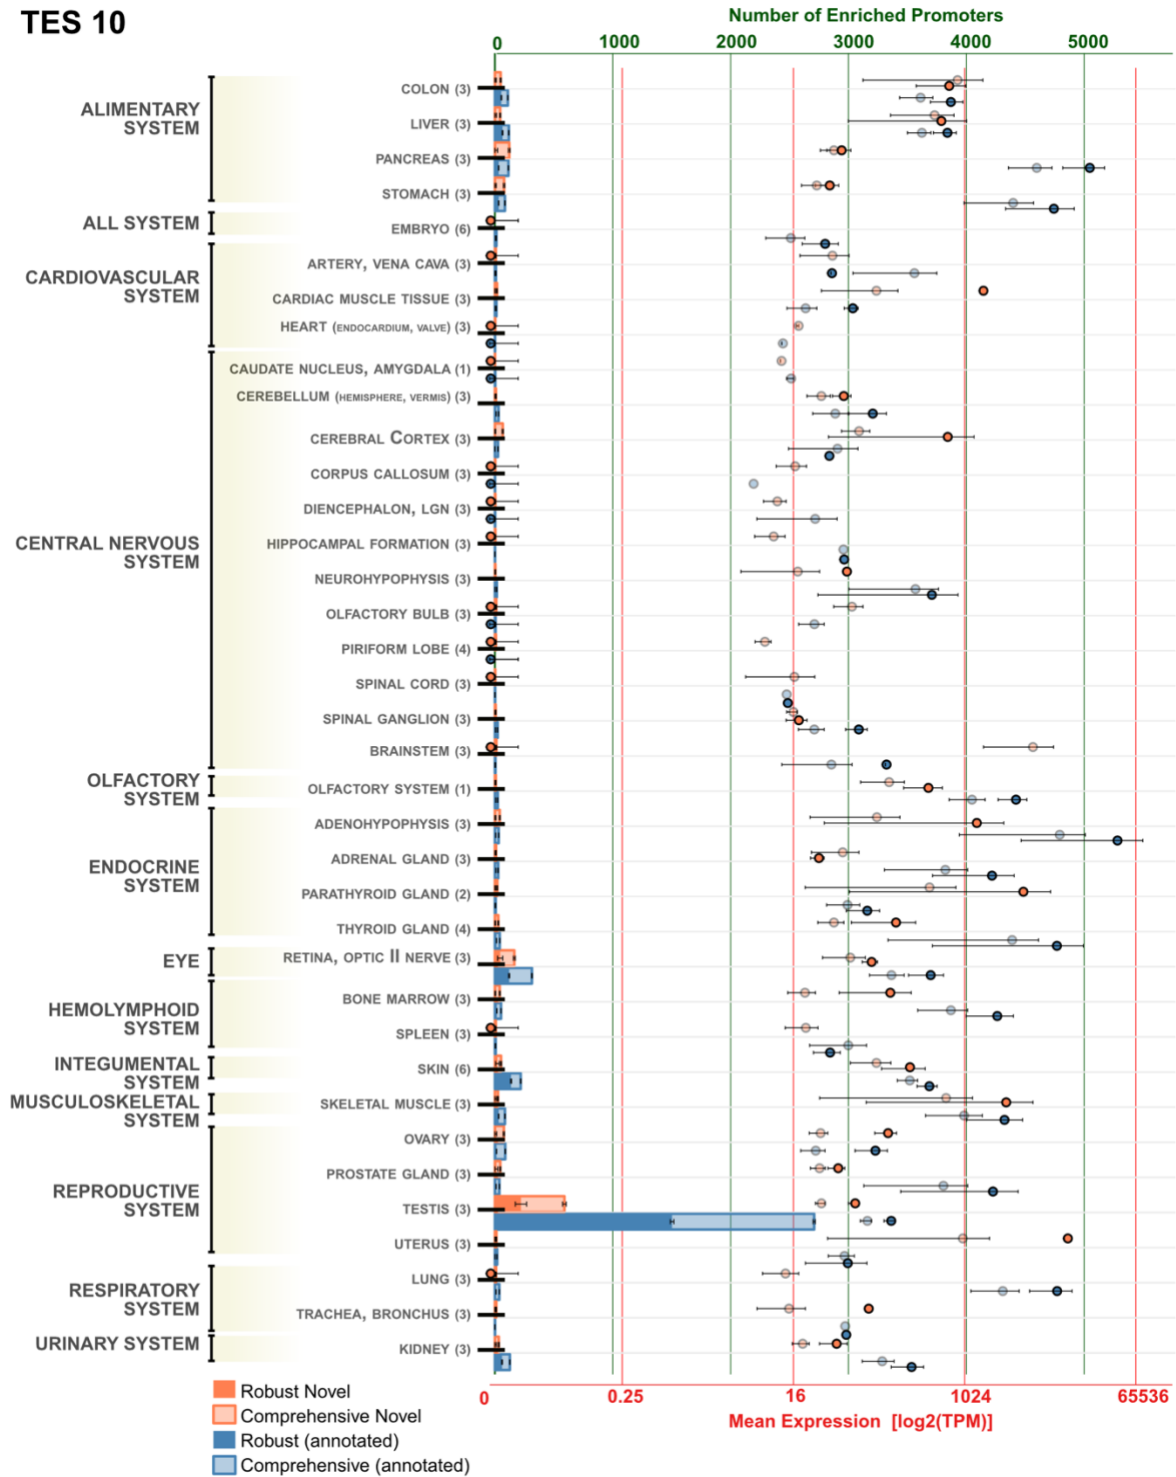

95

96 Figure S4: Tissue Enrichment Score 10 - Promoter.

97 The figure shows promoters with a tissue enrichment score of ten for each tissue. The y-axis shows  
 98 CAGE tissue pools and the related organ systems, listed alphabetically. The top x-axis indicates  
 99 the number of promoters enriched in each tissue, while the bottom x-axis shows the mean  
 100 expression (TPM) with log2 scale of elements enriched in those tissues.

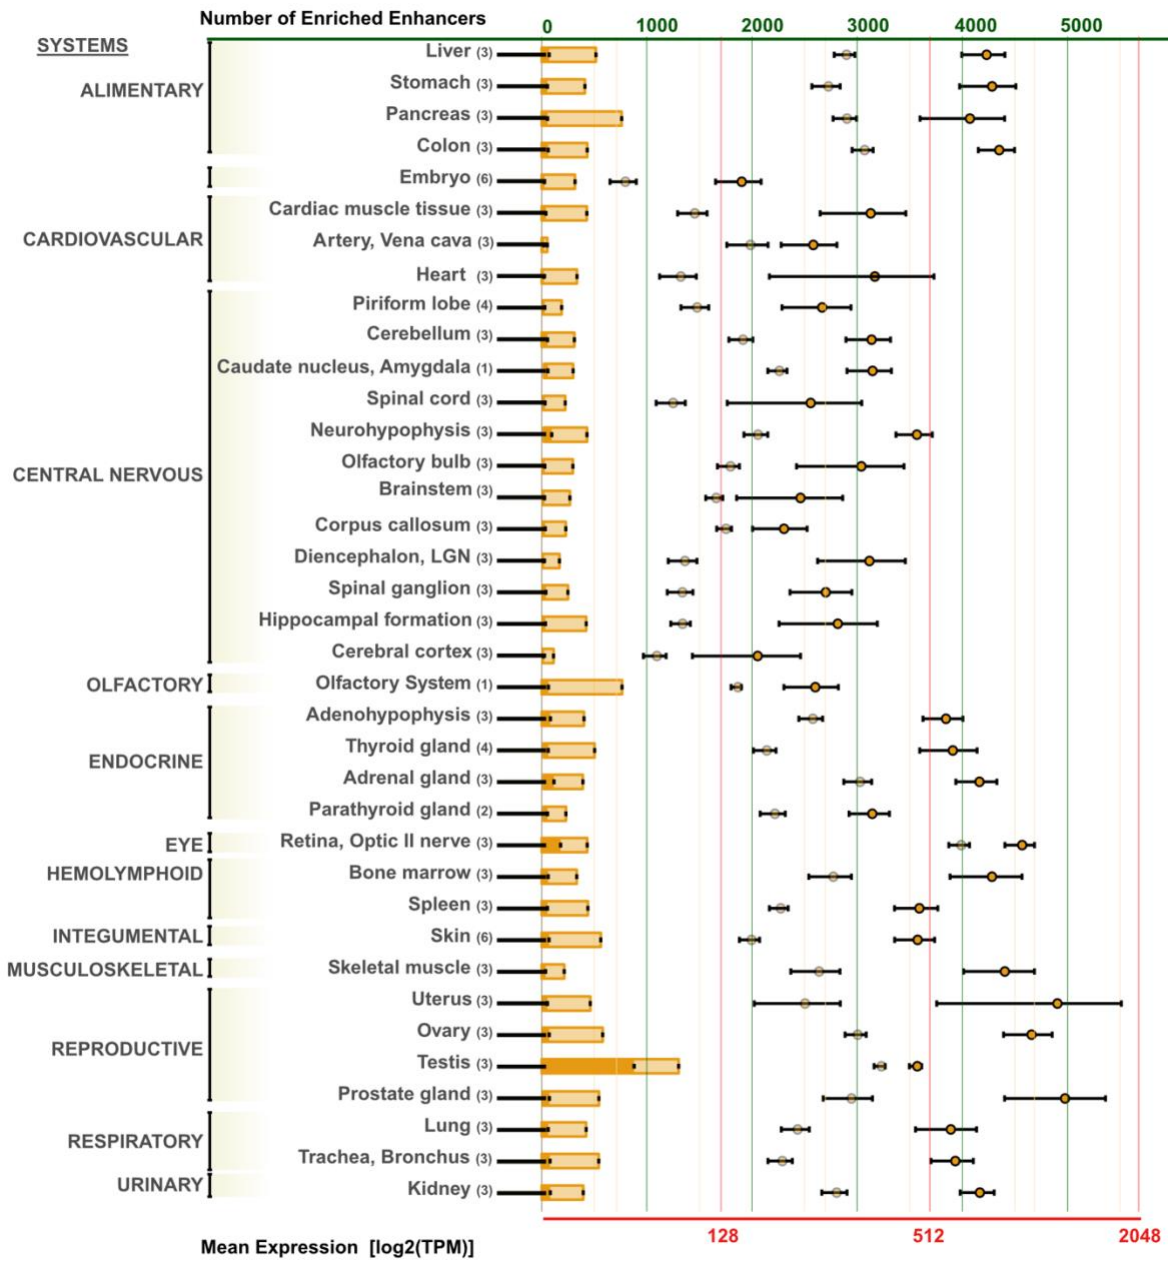

103 Figure S5: Tissue Enrichment Score 5 - Enhancer.

104 The figure shows enhancers with a tissue enrichment score of ten for each tissue. The y-axis shows  
 105 CAGE tissue pools and the related organ systems, listed alphabetically. The top x-axis indicates  
 106 the number of enhancers enriched in each tissue, while the bottom x-axis shows the mean  
 107 expression (TPM) with log2 scale of elements enriched in those tissues.

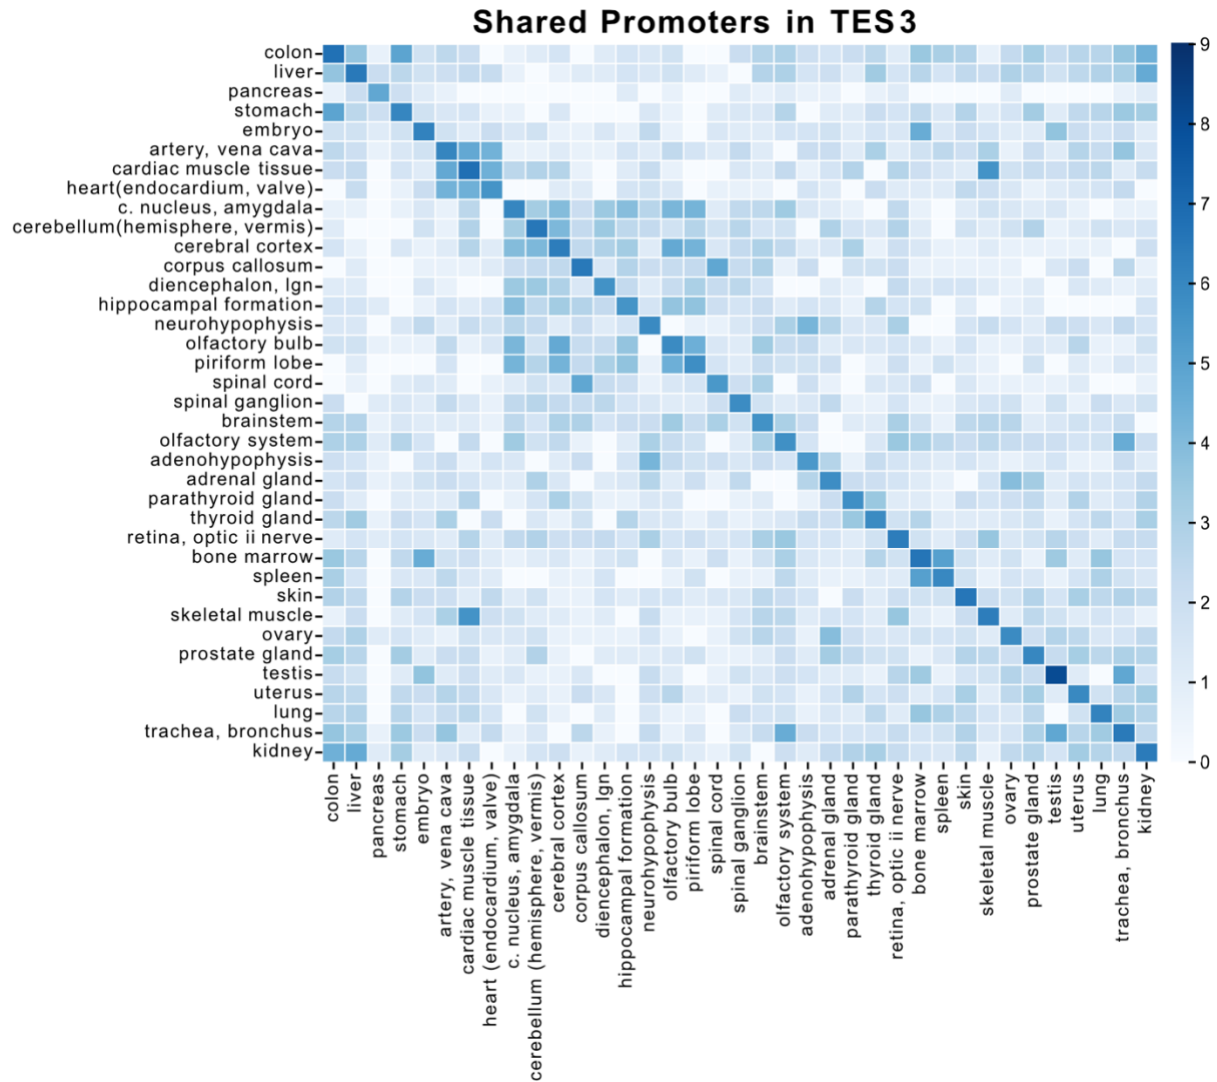

109

110 Figure S6: The common promoters in Tissue Enrichment Score 3.

111 The heatmap displays the common promoters with the log-transformed numbers in tissue  
 112 enrichment. The matrix indicates the comparison of each promoter element enriched in tissues  
 113 (TES 3 enriched promoter set was used), indicating common promoters between tissue pairs.

114

115

116

117

118

119

120

121

122

123

124

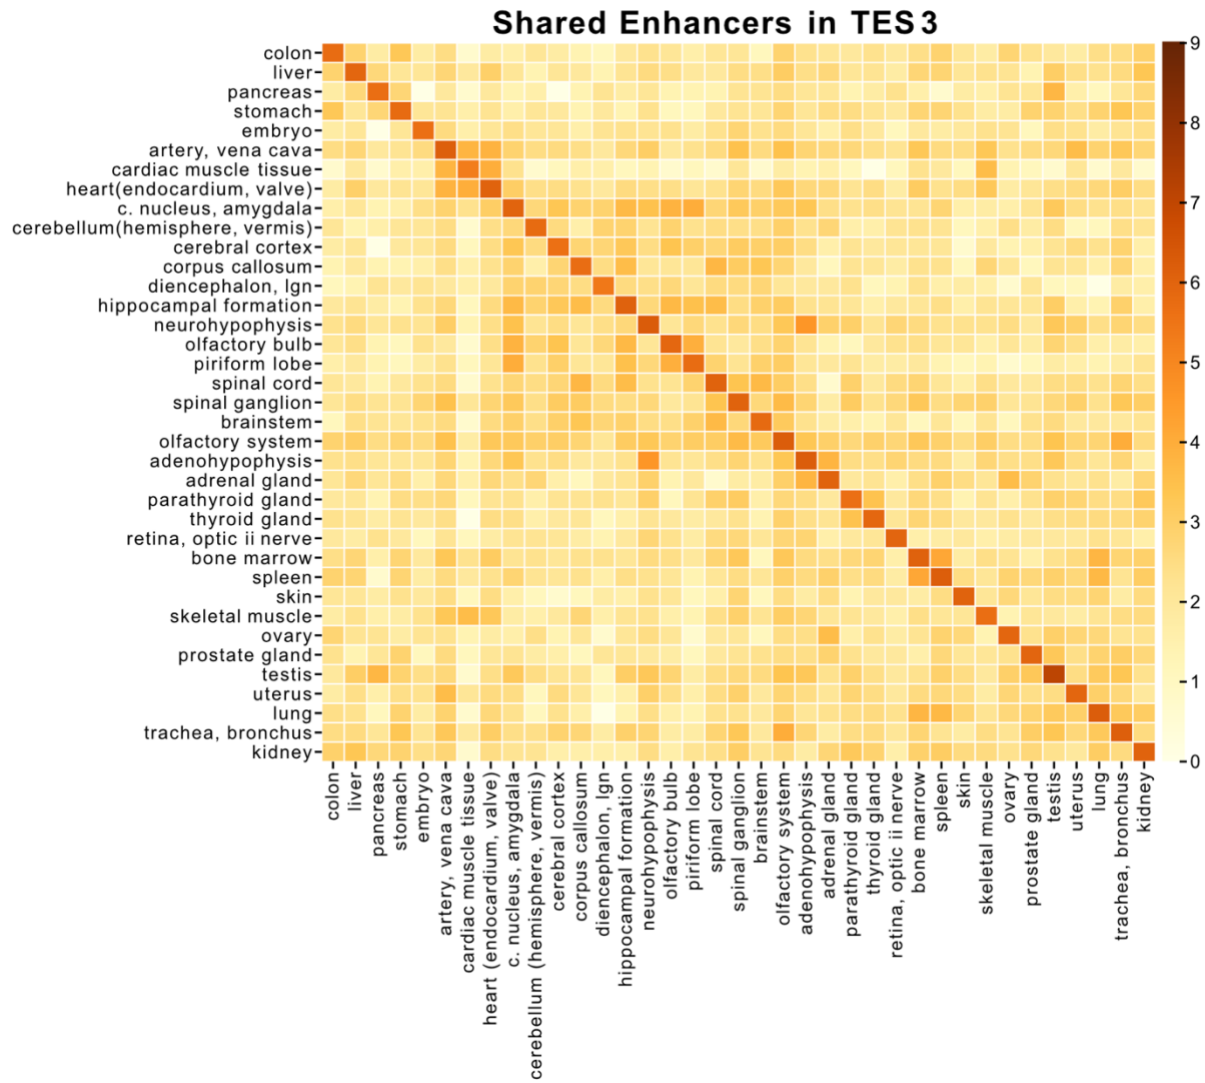

127 Figure S7: The common enhancers in Tissue Enrichment Score 3.

128 The heatmap displays the common enhancers with the log-transformed numbers in tissue  
 129 enrichment. The matrix indicates the comparison of each enhancer element enriched in tissues  
 130 (TES 3 enriched enhancer set was used), indicating common enhancers between tissue pairs.





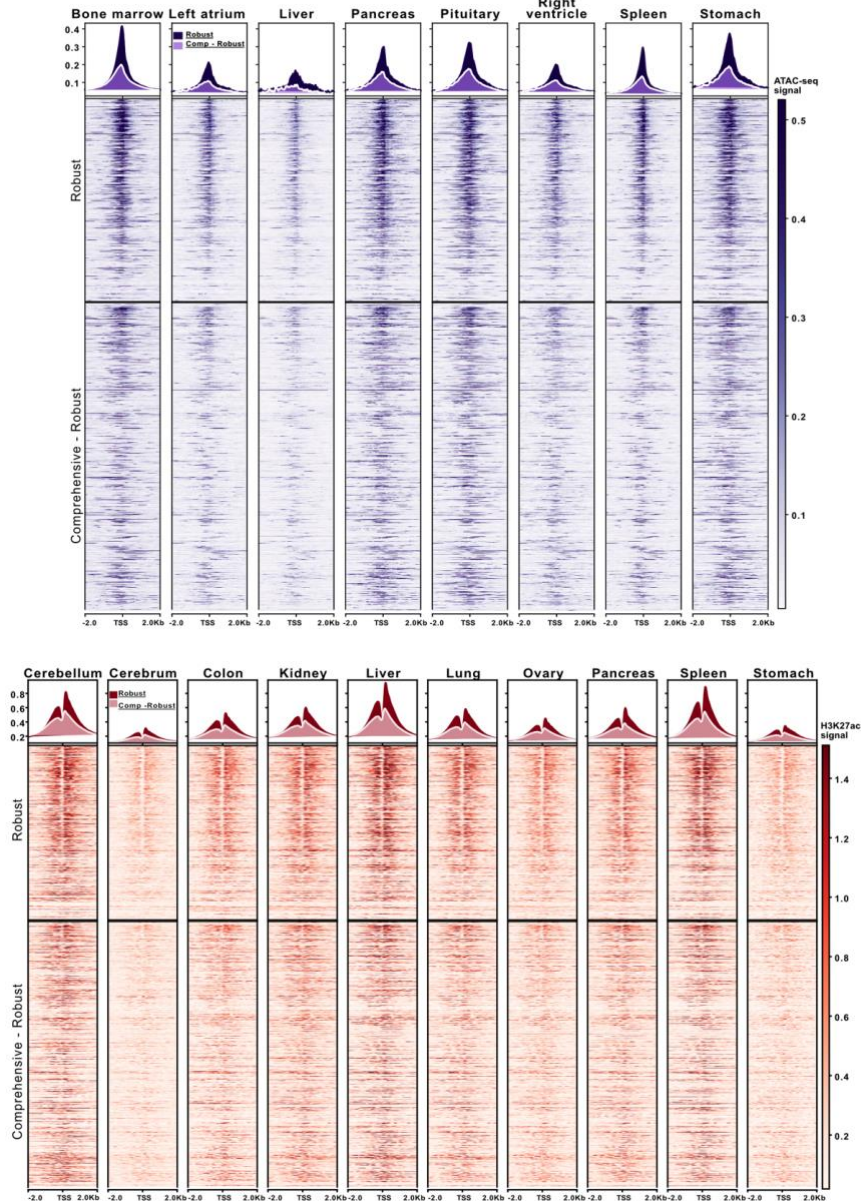

148

149 Figure S10: Evaluation of the DoGA promoter candidates by open chromatin marks and histone  
 150 marks.

151 The heatmaps show external validation of the promoter candidates by open chromatin and  
 152 H3K27ac marker. (A) Eight different dog tissue samples for ATAC-seq and (B) eleven for  
 153 H3K27ac ChIP-seq data were analyzed. All heatmaps are sorted by expression of CAGE-defined  
 154 promoters. The range of heatmaps spans +/- 2000 bp around the midpoints of each promoter. The  
 155 line plots show mean values for each signal column. Strong signals for promoters were observed  
 156 in ATAC-seq data, and a typical peak-valley-peak pattern appeared in H3K27ac ChIP-seq data.  
 157

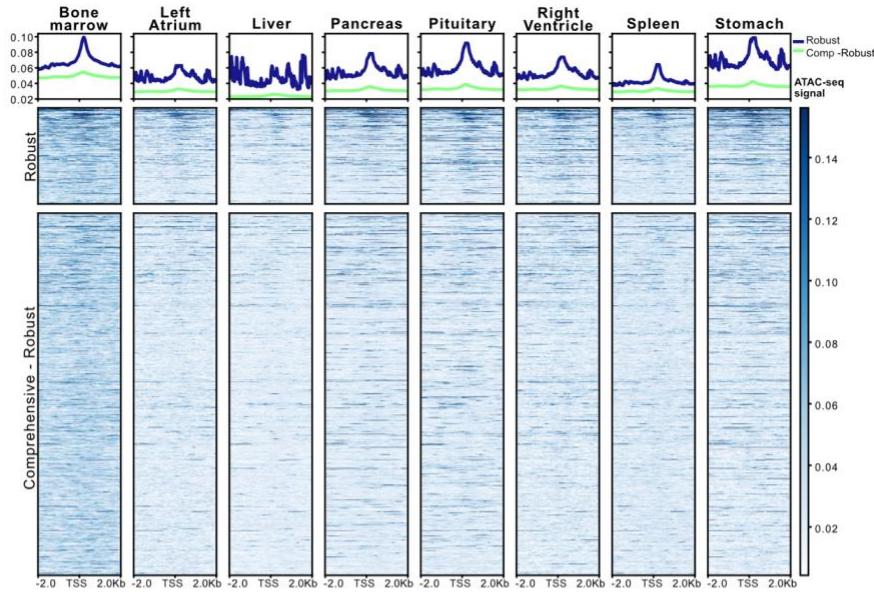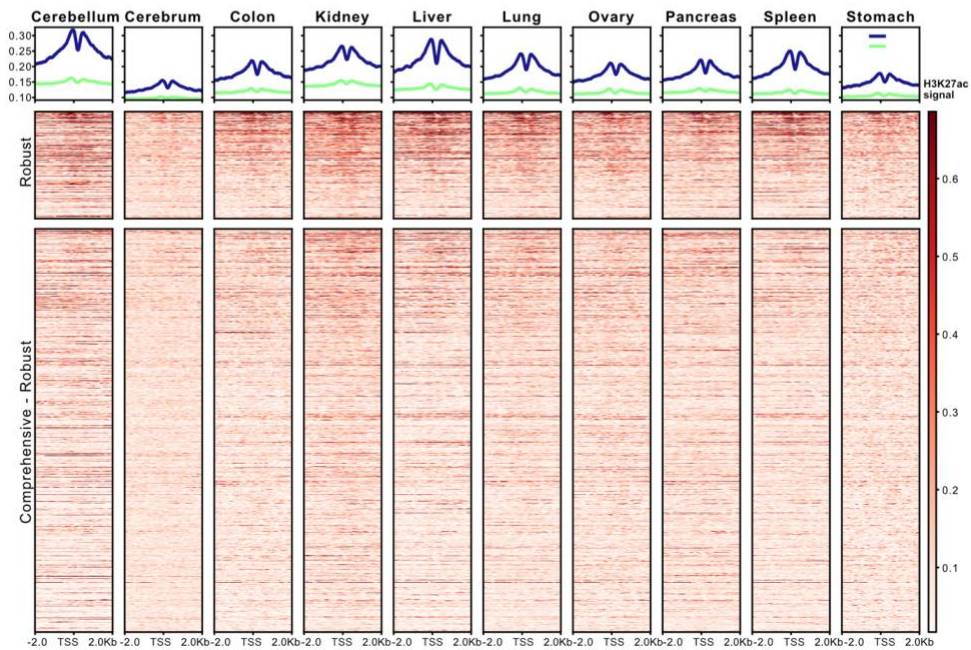

158

159 Figure S11: Evaluation of the DoGA enhancer candidates by open chromatin marks and histone  
 160 marks.

161 The heatmaps show external validation of the enhancer candidates by open chromatin and  
 162 H3K27ac marker. (A) Eight different dog tissue samples for ATAC-seq and (B) eleven for  
 163 H3K27ac ChIP-seq data were analyzed. All heatmaps are sorted by expression of CAGE-defined  
 164 enhancers. The range of heatmaps spans +/- 2000 bp around the midpoints of each enhancer. The  
 165 line plots show mean values for each signal column. Notable peaks with relatively weak signals  
 166 compared to promoters were observed in ATAC-seq data, and a typical peak-valley-peak pattern  
 167 appeared in H3K27ac ChIP-seq data.

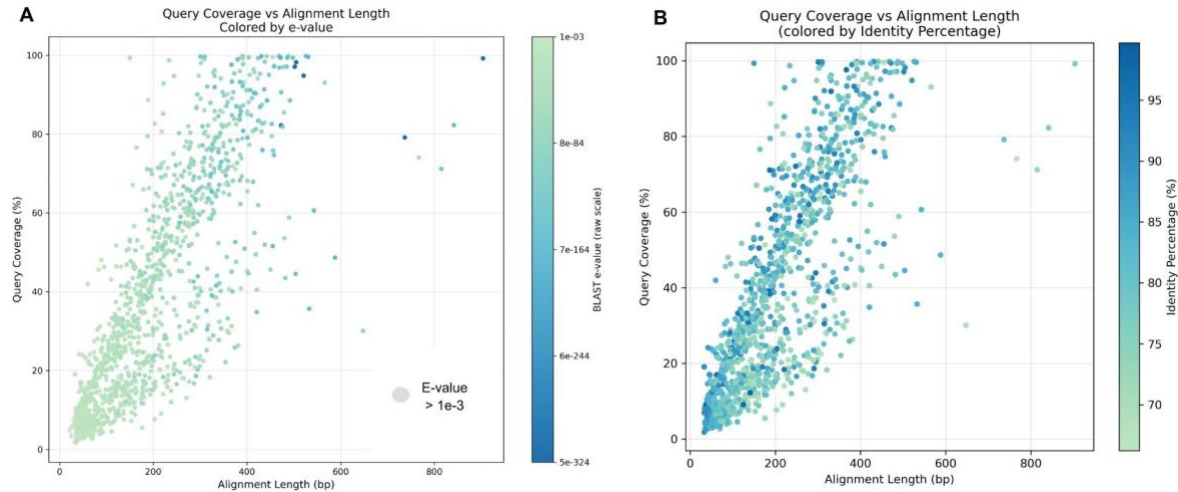

168

169 Figure S12: Comparison of BLAST alignment results between query sequences (DOGA dog  
170 enhancers) and subject sequences (FANTOM5 human enhancers).

171 (A) points are coloured according to BLAST e-value, with darker colours indicating more  
172 significant matches. (B) points are coloured by identity percentage, with higher identity values  
173 shown in darker colours. In both figures, each point represents a single BLAST match, with  
174 alignment length (bp) shown on the y-axis and percentage of query coverage on the x-axis.  
175

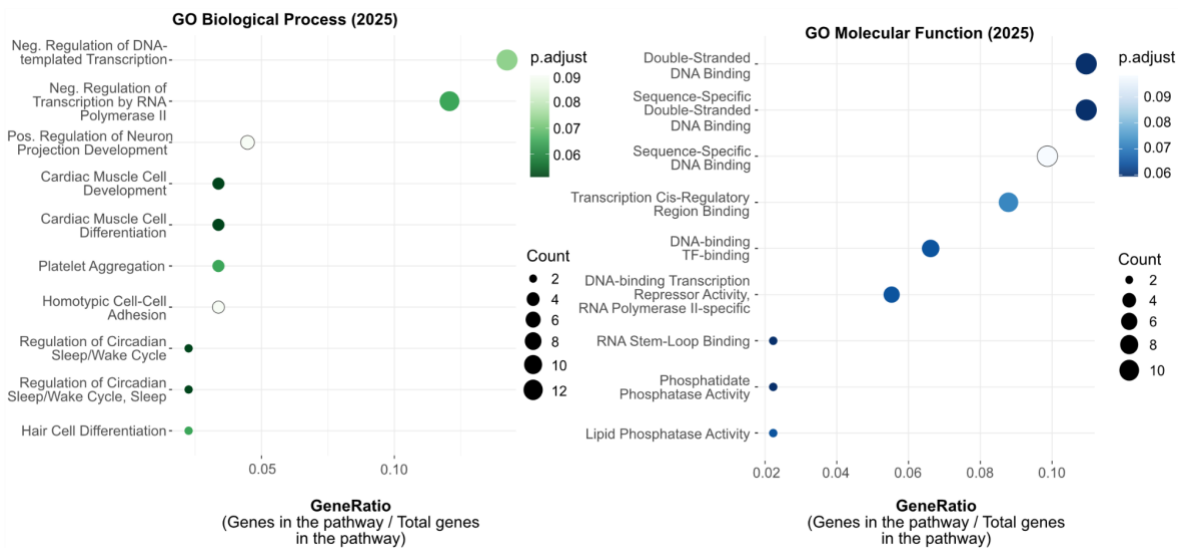

176

177 Figure S13: Gene ontology enrichment analysis of potential human orthologs using EnrichR.

178 Enriched Gene Ontology (GO) terms for the Biological Process and Molecular Function ontologies  
179 were illustrated, while Cellular Components didn't have any ontologies exceeding the set limit  
180 value. The x-axis represents the gene ratio (the proportion of input genes annotated to each GO  
181 term), while the y-axis lists the enriched GO terms. The size of each dot corresponds to the number  
182 of genes associated with each term, and the color reflects the adjusted P value (Benjamini–  
183 Hochberg FDR). Only terms that meet the enrichment cutoff (<0.1) are displayed.

Query dog robust enhancer set: 9,787 enhancers  
 Subject human permissive enhancer set: 65,423 enhancers  
 Enhancers were collected from all tissues available.

**Step 1.** Enhancer sequences from dog and human were compared based on nucleotide sequence similarity using BLAST (dc-megablast) with parameter --max-hsps=1, collecting only the best match for each human sequence based on expect value. Altogether, 1,312 matches were found.

**Step 2.** Enhancer matches were filtered to remove low-confidence alignments, excluding matches with e-values above  $1e-3$ . 1,199 matches passed the filtering criteria.

**Step 3.** Dog enhancers with human sequence similarity were intersected with an existing robust enhancer-promoter dataset (2,613 pairs) using BEDTools intersect, considering only direct overlaps and no windowing, to collect associated promoters. We found 403 overlapping enhancers.

Robust annotated set contained promoters with gene annotation, within with a range of 500 bp downstream and 1000 bp upstream. This set consisted of 139 promoter with gene annotation.

**Step 4.** The genes corresponding to the promoters were extracted, and for multiple promoters of the same gene, only unique gene names were kept. The dog genes were mapped based on annotation to human genes using Ensembl Compara. Only genes with homology type "one2one" were included while "one2many" were excluded to avoid genes with multiple possible mapped genes.

Robust annotated set: 93 potential orthologs

**Step 5.** Potential human orthologs were mapped to enhancers regulating the specific genes, based on ABC Model. The enhancers coordinates were compared to 1199 original subject enhancers from BLAST analysis with BEDtools intersect.

We found 76 same genes from ABC-derived genes and potential orthologs from

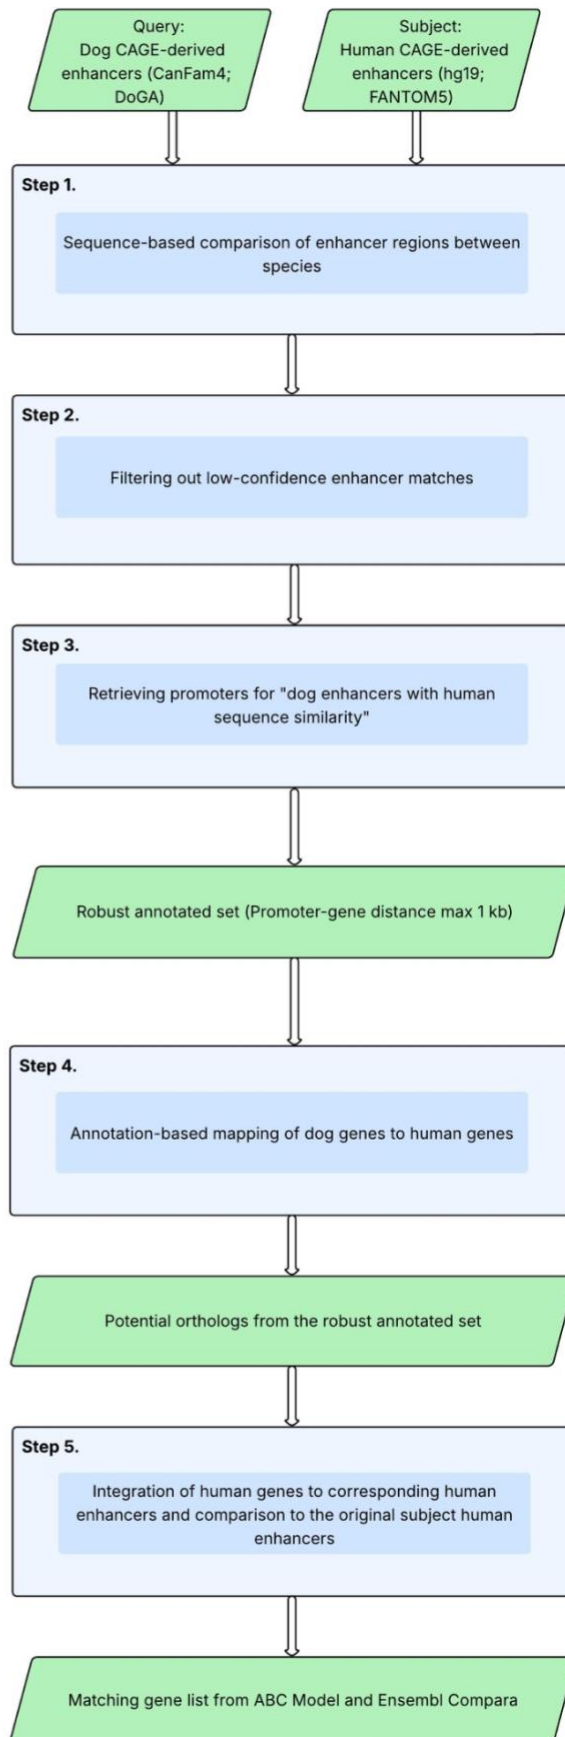

185 Figure S14: Workflow for Use Case 3: Enhancers exhibit sequence similarity between dogs and  
186 humans

187 The workflow illustrates the steps of the investigation of the enhancer sequence similarity between  
188 dogs and humans. Dog CAGE-derived enhancers (CanFam4; DoGA,  $n = 9,787$ ) were compared  
189 to human CAGE-derived enhancers (hg19; FANTOM5,  $n = 65,423$ ) using sequence similarity.  
190 Enhancer sequences were aligned with BLAST (dc-megablast), keeping the best human match per  
191 query, followed by filtering for low-confidence alignments ( $e\text{-value} \leq 1 \times 10^{-3}$ ). Dog enhancers with  
192 human sequence similarity were intersected with an enhancer–promoter interaction dataset to  
193 identify associated promoters. Promoters were assigned using a robust annotation ( $<1$  kb from  
194 gene). Genes linked to the identified promoters were mapped from dog to human using Ensembl  
195 Compara, retaining only one-to-one orthologs. This analysis identified 93 potential orthologs.  
196 From the original set of human enhancers, 1,199 with BLAST matches were retained and  
197 intersected with BEDtools and Activity-by-Contact (ABC) model enhancer–gene predictions,  
198 identifying 8,092 associated human genes. These genes were compared with 93 human orthologs  
199 identified from dog genes using Ensembl Compara, of which 76 overlapped in at least one cell  
200 line. The right panel shows a simplified overview of the workflow, and the left panel provides  
201 methodological details.  
202

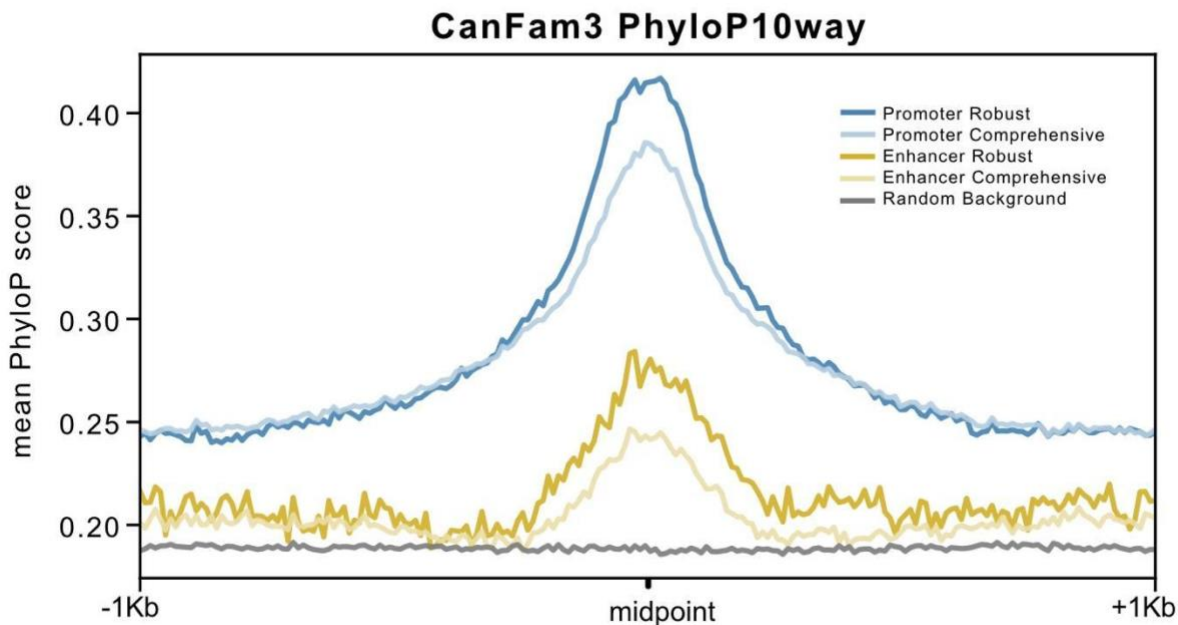

203 Figure S15 - Comparative Genomics: Promoter and Enhancer conservation

204 X-axes represent the mean PhyloP11 scores for dog genome regions derived from the study by  
205 Capriotti et al., which is based on alignments with 10 mammalian species genomes: Human,

206 Chimpanzee, Mouse, Rat, Cow, Panda, Marmoset, Cat, Horse, and Opossum. The conservation  
207 plot displays regions extending 1000 bp around the midpoints of each element in both directions.  
208

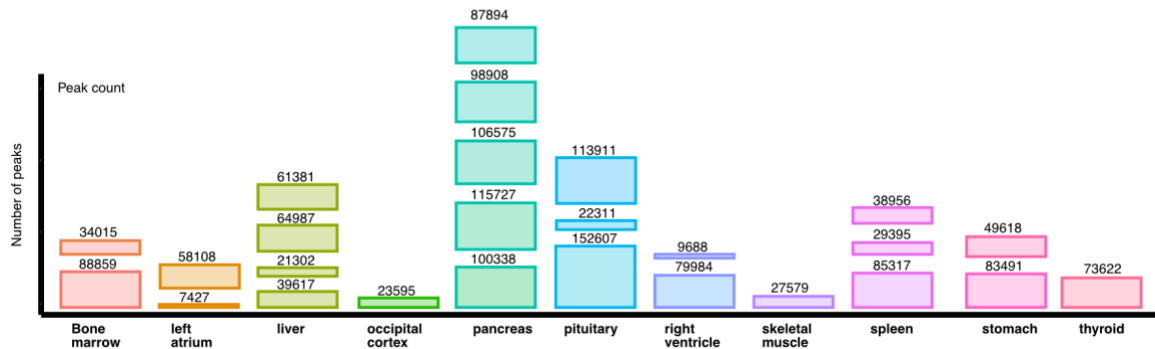

209  
210

211 Figure S16 - ATAC-seq data processing Quality control

212 The X-axis shows the tissues provided by BarkBase. The y-axis represents the number of peaks.  
213 The occipital cortex was excluded from additional processing as a result of the low quality scores  
214 and the quantity of peaks.  
215
